# Supplementary material for: Msps governs acentrosomal microtubule assembly and reactivation of quiescent neural stem cells
Source: PubMed Central journal article supplement — EMBO J. 2021 Aug 9;40(19):e104549. doi: 10.15252/embj.2020104549 (PMC8488572; doi:10.15252/embj.2020104549), 2021-08-09
Supplement: EMBJ-40-e104549-s010.pdf [file EMBJ-40-e104549-s010.pdf]

## Expanded View Figures

### Figure EV1. The centrosomes in qNSCs are immature.

- A Larval brains at 2 h after larval hatching (ALH) from *grainy head (grh)*-Gal4; UAS-CD8-GFP were labeled with Asterless, Deadpan (Dpn) and GFP. Arrows indicate the centrosomes.
- B Larval brains at 0 h ALH from *grh*-Gal4; UAS-CD8-GFP were labeled with CNN, Asl, Deadpan (Dpn), and GFP. Arrows indicate the centrosomes.
- C Wild-type larval brains expressing CNN-GFP (MiMIC line; BDSC#60266) at 0 h ALH were labeled with GFP, Dpn, and Msps. A representative qNSC and interphase Mushroom body (MB) NSC are shown.
- D Wild-type larval brains expressing *grh*>CD8-GFP at 6 h ALH were labeled with CNN, Asl, Dpn, and GFP. Arrows indicate the centrosomes.
- E Quantification of the cell diameter of CNN-negative vs CNN-positive qNSCs from wild-type brains expressing *grh*>CD8-GFP at 6 h ALH.  $n = 26$  NSCs for CNN-negative qNSCs;  $n = 14$  NSCs for CNN-positive qNSCs. \*\*\*\* $P < 0.0001$ .
- F Quantification graph of the ratio of CNN intensity between qNSCs and mushroom body (MB) NSCs from 0 h ALH and 6 h ALH larval brains in (B, D).  $n = 40$  NSCs for 0 h ALH;  $n = 99$  for 6 h ALH. \*\*\*\* $P < 0.0001$ .
- G Wild-type larval brains expressing *grh*>CD8-GFP at 0 h ALH were stained with  $\gamma$ -tubulin, Dpn, and GFP. A representative qNSC and interphase Mushroom body (MB) NSC are shown. Arrows indicate the centrosome.
- H Wild-type larval brains expressing *grh*>CD8-GFP at 0 h ALH and 6 h ALH were labeled with  $\gamma$ -tubulin, Dpn, and GFP. Arrows indicate the centrosome.
- I Quantification graph of the ratio of  $\gamma$ -tub intensity between qNSCs and mushroom body (MB) NSCs from 0 h ALH and 6 h ALH larval brains in (H).  $n = 84$  NSCs for 0 h ALH;  $n = 63$  NSCs for 6 h ALH. \*\*\*\* $P < 0.0001$ .
- J Larval brains at 0 h ALH from *insc*-Gal4; UAS- $\beta$ -tubulin-Venus were labeled with GFP, Msps and Dpn. Quiescent NSCs at the CB are shown. The arrow points at the centrosome.
- K Wild-type larval brains expressing *grh*>CD8-GFP at 6 h ALH were labeled with  $\alpha$ -tubulin, Dpn and GFP, and wild-type larval brains at 16 h ALH were labeled with  $\alpha$ -tubulin, Msps and Dpn.
- L Larval brains expressing Msps-GFP under the control of *insc*-Gal4 at 16 h ALH were labeled with GFP, Dpn, and Mira.

Data information: In (E, F, I), data are presented as mean  $\pm$  SD. In (E, F, I), statistical significances were determined by two-tailed Student's *t*-test. Scale bars: 10  $\mu$ m.

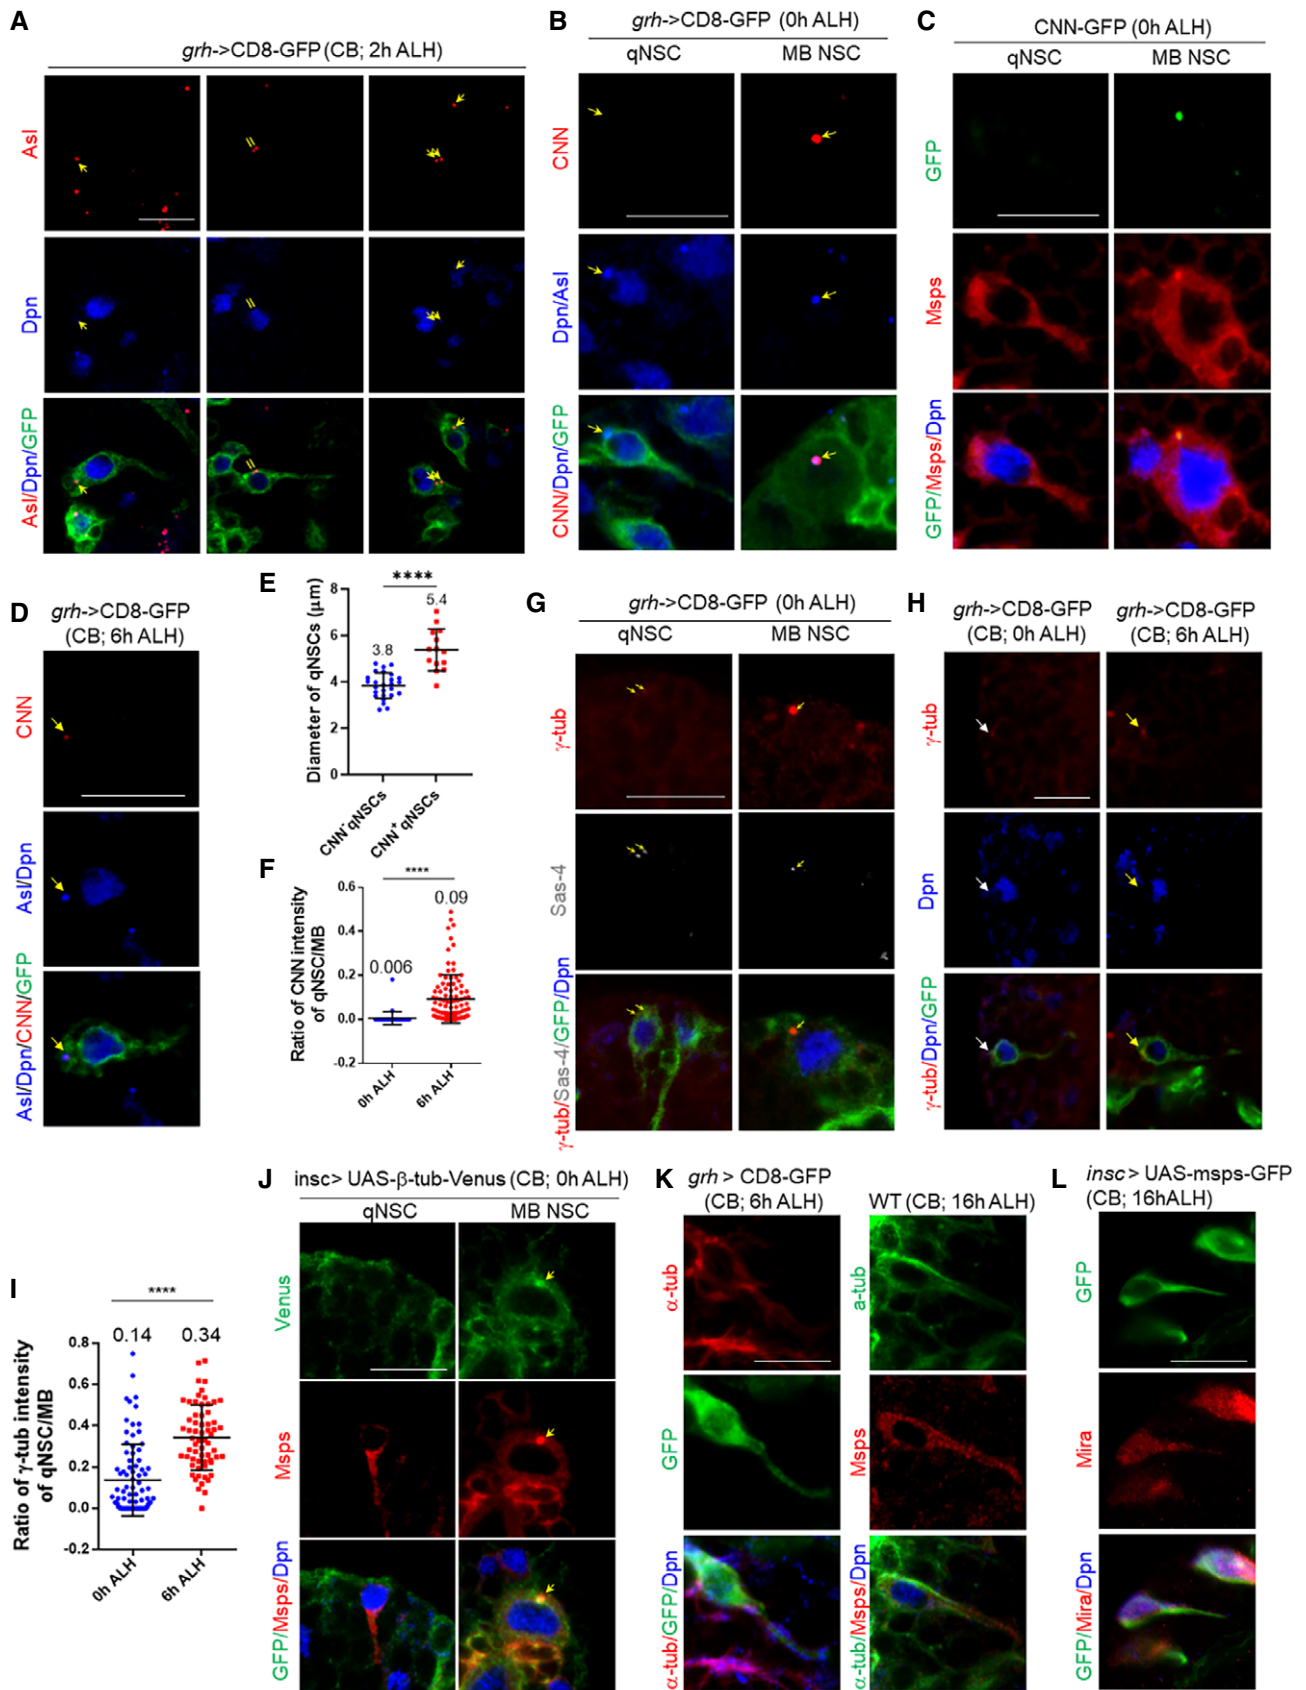

Figure EV1.

**Figure EV2. Msp, but not Arl2, is essential for NSC reactivation.**

- A Larval brains at 24 h ALH from control (*insc-Gal4; UAS-dicer2 / UAS-β-Gal RNAi*), *arl2* RNAi (VDRC#110627); *UAS-dicer2* and *UAS-arl2<sup>T30N</sup>* under the control of *insc-Gal4* were analyzed for EdU incorporation. NSCs were marked by Dpn and Mira. Arrows indicate EdU- negative NSCs.
- B Quantification of EdU-negative NSCs per brain lobe for genotypes in (A).  $n = 15$  BL for control;  $n = 11$  BL for *arl2* RNAi;  $n = 11$  BL for *UAS-arl2<sup>T30N</sup>*. \*\*\*\* $P < 0.0001$ ;  $P = 0.1547$  (ns).
- C Larval brains from various genotypes were labeled with Msp, Dpn, and GFP at the indicated time points. Left panels, wild-type, *msps<sup>924</sup>*, and *msps<sup>P18</sup>*, all expressing CD8-GFP under the control of *grh-Gal4*. Middle panels, control (*UAS-β-Gal RNAi*) and *msps* RNAi expressing CD8-GFP under the control of *insc-Gal4*. Right panels, control (*UAS-β-Gal RNAi*) and *msps* RNAi under *grh-Gal4*. Note that not all qNSCs were labeled by *grh*>CD8-GFP at early larval stages. White arrows point at the cell body and yellow arrows indicate the primary protrusion of the qNSC.
- D Larval brains at 0 h ALH from wild-type, *msps<sup>924</sup>*, and *msps<sup>P18</sup>* expressing *grh*>CD8-GFP were labeled with Msp, Dpn, and GFP.
- E Larval brains at 24 h ALH from control (*grh*>CD8-GFP) and *msps<sup>924</sup>* expressing *grh*>CD8-GFP were labeled with Dpn and GFP. Single NSC lineage in the box was magnified in the panel on the right. Arrows indicate NSCs.
- F Quantification of the total NSC number from genotypes in (E).  $n = 10$  BL for control;  $n = 14$  BL for *msps<sup>924</sup>*. \*\*\*\* $P < 0.0001$ .

Data information: in (B, E), data are presented as mean  $\pm$  SD. In (B), statistical significance was determined by one-way ANOVA with multiple comparisons. In (E), statistical significance was determined by two-tailed Student's *t*-test. Scale bars: 10  $\mu$ m.

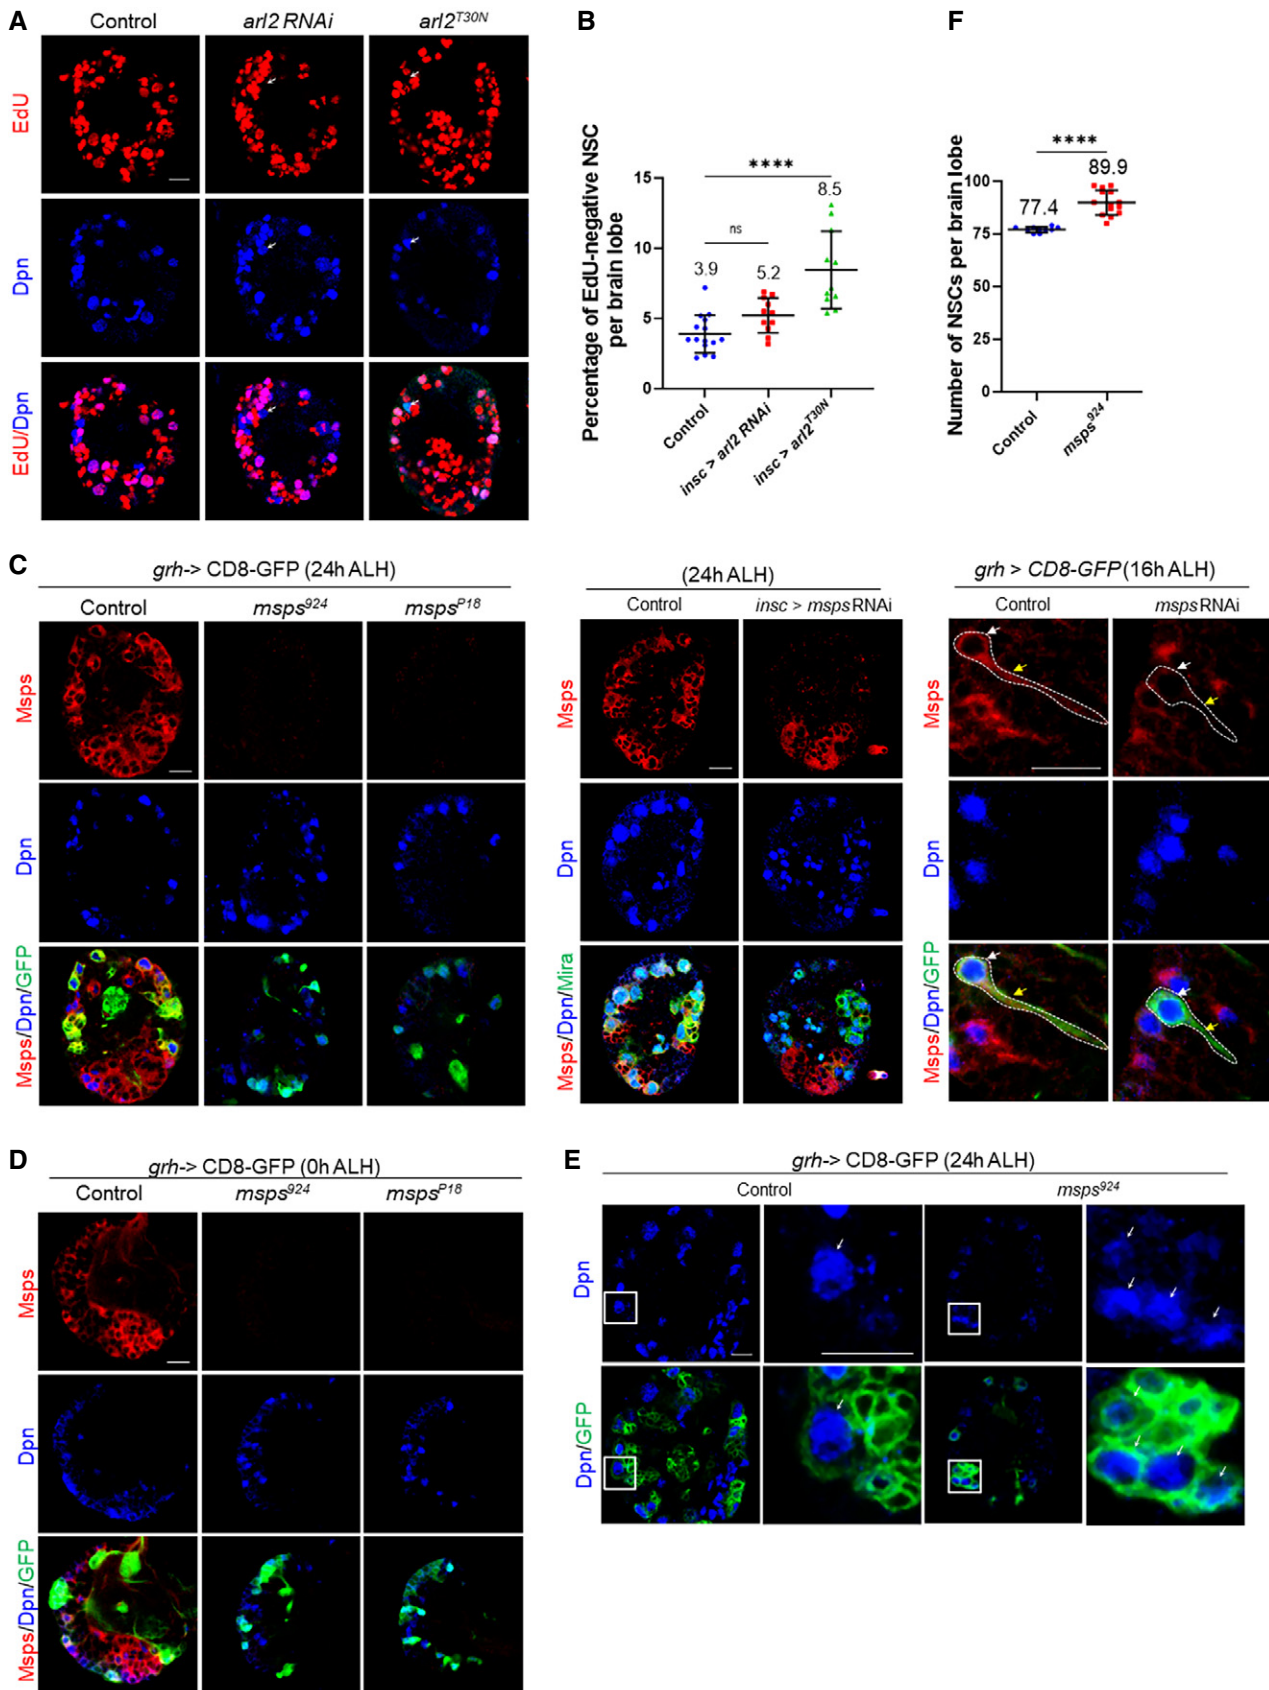

Figure EV2.

**Figure EV3. Microtubule assembly in the primary protrusion of qNSCs is centrosome-independent.**

- A, B (A) Larval brains at 6 h ALH from *sas-4* RNAi with *grh*-Gal4; *UAS-EB1-GFP* were stained with Sas-4, Dpn, and GFP. Primary protrusion of qNSCs was marked by GFP. (B) Larval brains at 6 h ALH *ana2* RNAi *ana2*<sup>719/+</sup> with *grh*-Gal4; *UAS-EB1-GFP* were stained with Ana2, Dpn, and GFP. Primary protrusion of qNSCs was marked by GFP. Efficient knockdown of *sas4* or *ana2* in GFP-positive qNSCs with primary protrusion is shown in (A, B). Sas4 and Ana2 staining were present in some of the GFP-negative NSCs, which were shown as positive controls in (A, B). Arrows indicate the centrosome.
- C Kymograph of EB-GFP comet movement in the primary protrusion of qNSCs from control (*UAS-β-Gal* RNAi), *sas-4* RNAi (VDRC#106051), and *ana2* RNAi; *ana2*<sup>719/+</sup> with *grh*-Gal4; *UAS-EB1-GFP* at 6 h ALH. The horizontal arrow indicates anterograde movement direction from the cell body to the tip of the primary protrusion in qNSCs. Kymographs with and without colored lines were shown.
- D Quantification graph of the fold change of the number of EB1-GFP comets in the primary protrusion of qNSCs from genotypes in (C). *n* = 2 individual experiments per genotype. Control vs *sas-4* RNAi, *P* = 0.6174 (ns); control vs *ana2* RNAi; *ana2*<sup>719/+</sup>, *P* = 0.9941 (ns).
- E Larval brains at 24 h ALH from control (*grh*-Gal4; *UAS-dicer2/UAS-β-Gal* RNAi) and *sas-4* RNAi (VDRC#106051) and *ana2* RNAi; *ana2*<sup>719/+</sup> controlled under *grh*-Gal4 were analyzed for EdU incorporation. NSCs were marked by Dpn and Mira. Arrows point at EdU-negative NSCs.
- F Quantification graph of EdU-negative NSCs per brain lobe for genotypes in (E). \*\*\*\**P* < 0.0001; *P* = 0.9106 (ns). Control, 6.0%, *n* = 14 BL; *sas-4* RNAi, 12.6%, *n* = 18 BL. *ana2* RNAi, *ana2*<sup>719/+</sup>, 5.6%, *n* = 14 BL.
- G Quantification graph of the percentage of qNSCs with primary protrusion per brain lobe for genotypes in (E). Control, 4.9%, *n* = 9; *sas-4* RNAi, 10.7%, *n* = 14 BL; *ana2* RNAi, *ana2*<sup>719/+</sup>, 4.7%, *n* = 11 BL. \*\*\*\**P* < 0.0001; *P* = 0.8681 (ns).
- H Larval brains at 24 h ALH from control and *mmps*<sup>924</sup> expressing *grh*>CD8-GFP were labeled with Asl, Dpn, and GFP. Arrows indicate the centrosome.
- I Quantification graph of the percentage of qNSCs with Asl localized to apical, lateral, and PIS region of the qNSCs for the genotypes in (H). *n* = 10 NSCs for control; *n* = 10 NSCs for *sas-4* RNAi; *n* = 16 NSCs for *ana2* RNAi, *ana2*<sup>719/+</sup>.
- J Larval brains at 24 h ALH from control (*insc*-Gal4; *UAS-dicer2/UAS-β-Gal* RNAi) and *γ-tub23C* RNAi I (BDSC#42799) and *γ-tub23C* RNAi II (BDSC#31204) controlled under *insc*-Gal4 were analyzed for EdU incorporation. NSCs were marked by Dpn and Mira.
- K Quantification graph of EdU-negative NSCs per brain lobe for genotypes in (J). *n* = 12 BL for control; *n* = 11 BL for *γ-tub23C* RNAi I; *n* = 14 BL for *γ-tub23C* RNAi II. Control vs *γ-tub23C* RNAi I, *P* = 0.8825 (ns); control vs *γ-tub23C* RNAi II, *P* = 0.8379 (ns).
- L Larval brains at 24 h ALH for genotypes in (J) were stained with *γ-tub*, Msps, and Dpn. Arrows indicate the centrosome.

Data information: in (D, F, G, I, K), data are presented as mean ± SD. In (D, F, G, K), statistical significance was determined by one-way ANOVA with multiple comparisons. In (I), statistical significance was determined by two-way ANOVA with multiple comparisons. Scale bars: 10 μm.

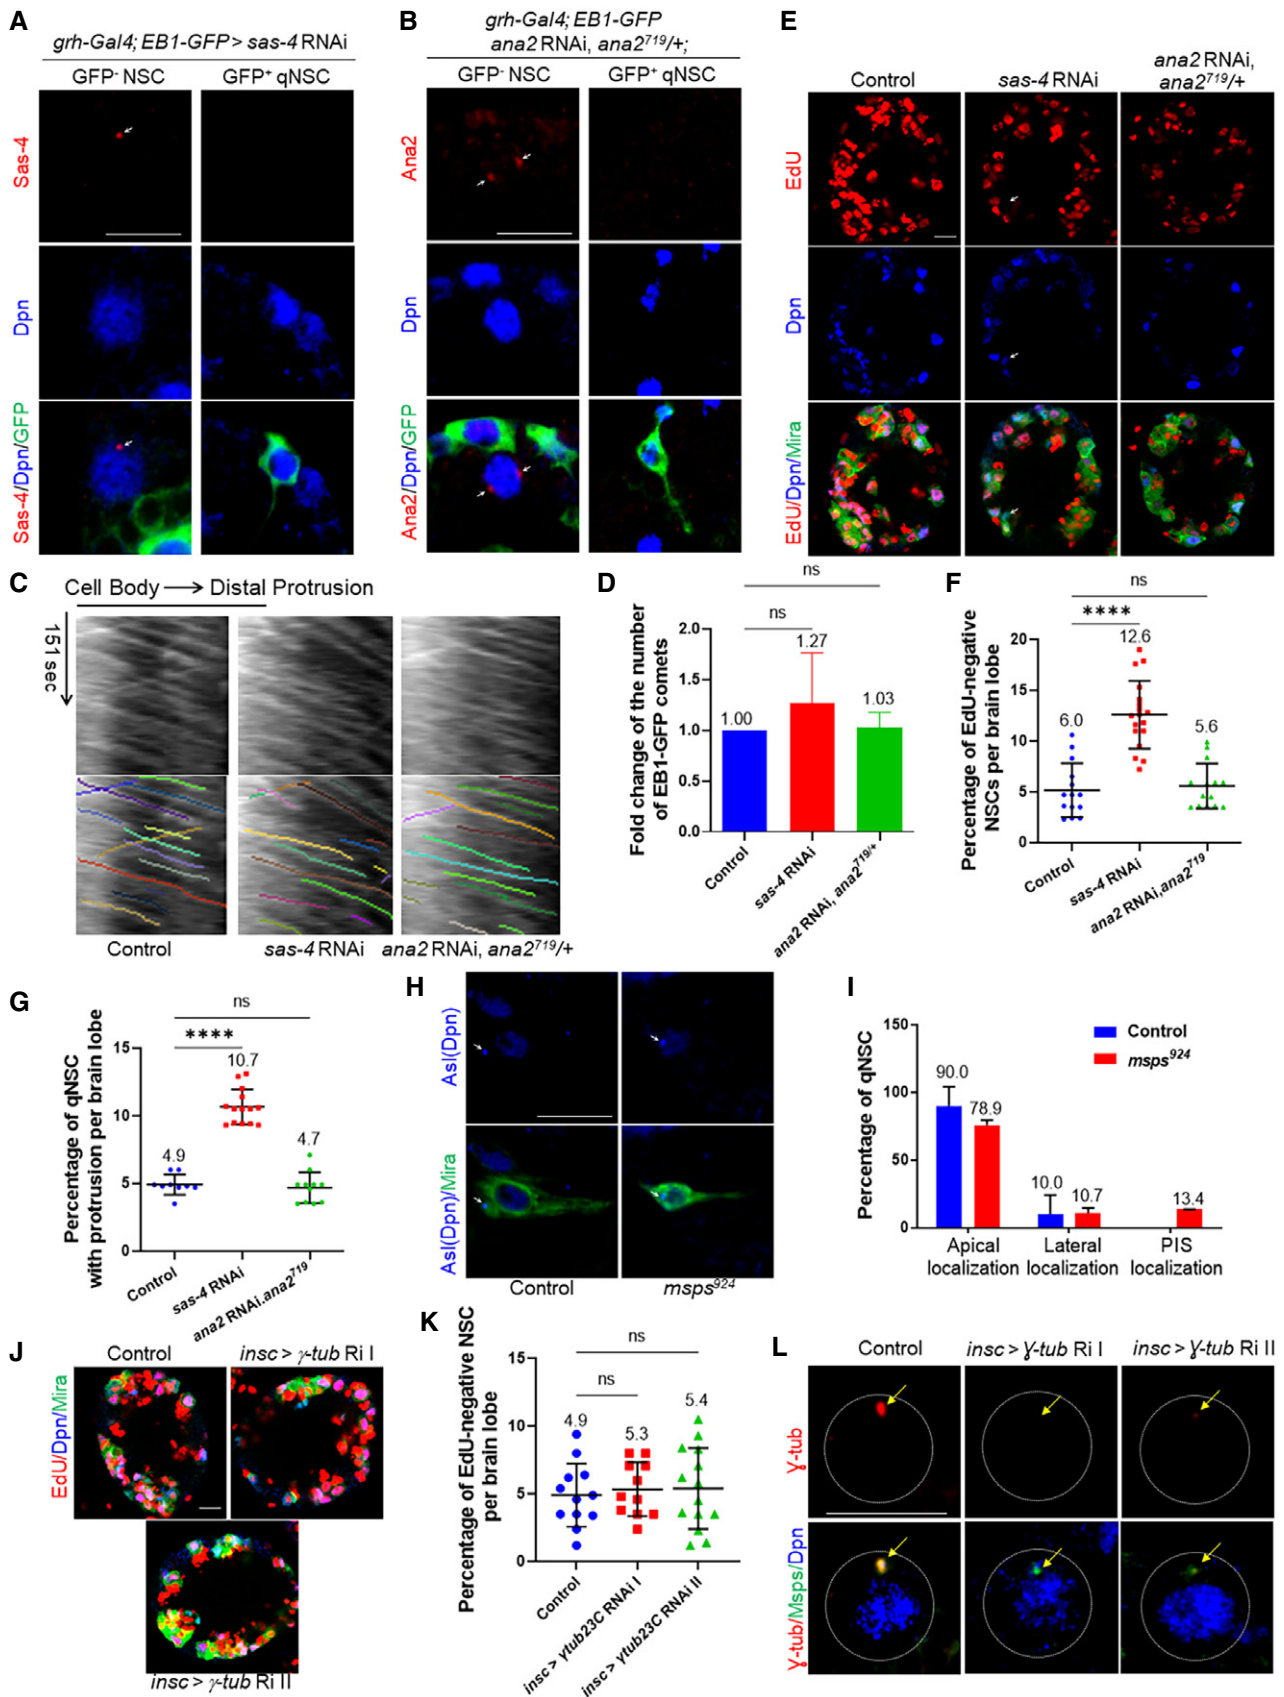

Figure EV3.

**Figure EV4. E-cad delocalization in *msps*-depleted qNSCs.**

- A Larval brains at 24 h ALH from control (*grh*>CD8-GFP) and *msps*<sup>924</sup> expressing *grh*>CD8-GFP were analyzed for  $\alpha$ -tubulin ( $\alpha$ -tub), and NSCs were labeled with Dpn and GFP. Boxes indicate the area that  $\alpha$ -tub intensity was measured.
- B Quantification graph of the  $\alpha$ -tub intensity for the genotypes in (A).  $n = 39$  NSC for control;  $n = 37$  NSC for *msps*<sup>924</sup>. Two biological replicates per each genotype.  $P = 0.1000$ .
- C Larval VNCs at 16 h ALH from the control (*grh*-Gal4 *UAS*-CD8-GFP; *UAS*-Dicer2 / *UAS*- $\beta$ -Gal RNAi) and *msps* RNAi under the control of with *grh*-Gal4 *UAS*-CD8-GFP; *UAS*-Dicer2 were labeled with E-cadherin, Dpn, and GFP. NSC-neuropil contact was marked by dashed lines, and NSC-neuropil contact points were circled.
- D Quantification of E-cadherin basal localization at NSC-neuropil contact sites in qNSCs from genotypes in (C). "No E-cad" means absent or strongly reduced E-cad observed at the tip of the protrusion in qNSCs.  $n = 39$  NSC for control;  $n = 44$  NSC for *msps* RNAi. Two biological replicates per genotype.  $***P = 0.0008$ .
- E Larval brains at 24 h ALH from mutant control (*grh*-Gal4; *UAS*- $\beta$ -Gal RNAi; *klp64D*<sup>ks<sup>h</sup></sup>) and rescued animals (*grh*-Gal4; *UAS*-*klp64D*; *klp64D*<sup>ks<sup>h</sup></sup>) were analyzed for EdU incorporation. NSCs were labeled with EdU, Dpn, and Mira. The number of EdU-negative NSCs was reduced to 10.5% in rescued animals ( $n = 11$  BL), which was significantly lower than 25.2% in *klp64D*<sup>ks<sup>h</sup></sup> ( $n = 13$  BL), and indistinguishable from the wild-type control (11.4%,  $n = 13$  BL). EdU-negative NSCs are indicated by arrows.
- F Quantification graph displaying NSCs remaining primary protrusion per brain lobe for genotypes in (E).  $****P < 0.0001$ ;  $P = 0.7542$  (ns). Only 6.1% of ( $n = 14$  BL) NSC remained cellular protrusion in the rescued animals, which was significantly reduced in contrast to 14.5% in *klp64D*<sup>ks<sup>h</sup></sup> ( $n = 10$  BL), and similar to the wild-type control (5.3%,  $n = 10$  BL).
- G Quantification graph showing NSCs negative for EdU incorporation for genotypes in (E).  $n = 13$  BL for control;  $n = 13$  BL for *klp64D*<sup>ks<sup>h</sup></sup>;  $n = 11$  BL for *UAS*-*klp64D*; *klp64D*<sup>ks<sup>h</sup></sup>.  $****P < 0.0001$ ;  $P = 0.9346$  (ns).
- H Quantification graph depicting NSCs positive for PH3 for genotypes in (E).  $****P < 0.0001$ ;  $P = 0.8768$  (ns). The number of PH3-positive mitotic NSCs in rescued animals (19.7%,  $n = 14$  BL) were increased compared with *klp64D*<sup>ks<sup>h</sup></sup> (9.9%,  $n = 11$  BL). Wild-type control, 20.7%,  $n = 10$  BL.
- I Larval brains at 24 h ALH from wild-type and hemizygous animals *klp64D*<sup>D<sup>fl</sup>/+</sup> (Df(3L)BSC371; BDSC# 24395) were examined for EdU incorporation. NSCs were labeled with EdU and Dpn. Only 7.3% of ( $n = 16$  BL) hemizygous *klp64D*<sup>D<sup>fl</sup>/+</sup> NSCs did not incorporate EdU, which was indistinguishable from 8.4% in wild-type control ( $n = 15$  BL).
- J Quantification graph showing the percentage of EdU-negative NSCs per brain lobe for genotypes in (I).  $n = 15$  BL for control;  $n = 16$  BL for *klp64D*<sup>D<sup>fl</sup>/+</sup>.  $P = 0.2042$  (ns).
- K Larval brains at 24 h ALH from control (*insc*-Gal4, *tub*-Gal80<sup>ts</sup>/*UAS*- $\beta$ -Gal RNAi) and *msps* RNAi driven by *insc*-Gal4, *tub*-Gal80<sup>ts</sup> were analyzed for EdU incorporation. NSCs were labeled with EdU, Dpn, and Mira. EdU-negative NSCs are indicated by arrows.
- L Quantification graph displaying the percentage of NSCs that fail to incorporate EdU per brain lobe for genotypes in (K).  $n = 13$  BL for control;  $n = 15$  BL for *msps* RNAi.  $****P < 0.0001$ .
- M Larval brains at 16 h ALH from *grh*-Gal4>*UAS*-E-cad-GFP were analyzed for GFP and E-cad. NSCs were labeled by Dpn. E-cad at the protrusion tip is circled. The cell body of qNSCs are pointed by arrows.

Data information: in (B, D, F–H, J, L), data are presented as mean  $\pm$  SD. In (B, D, J, L), statistical significance was determined by two-tailed Student's *t*-test. In (F–H), statistical significance was determined by one-way ANOVA with multiple comparisons. Scale bars: 10  $\mu$ m.

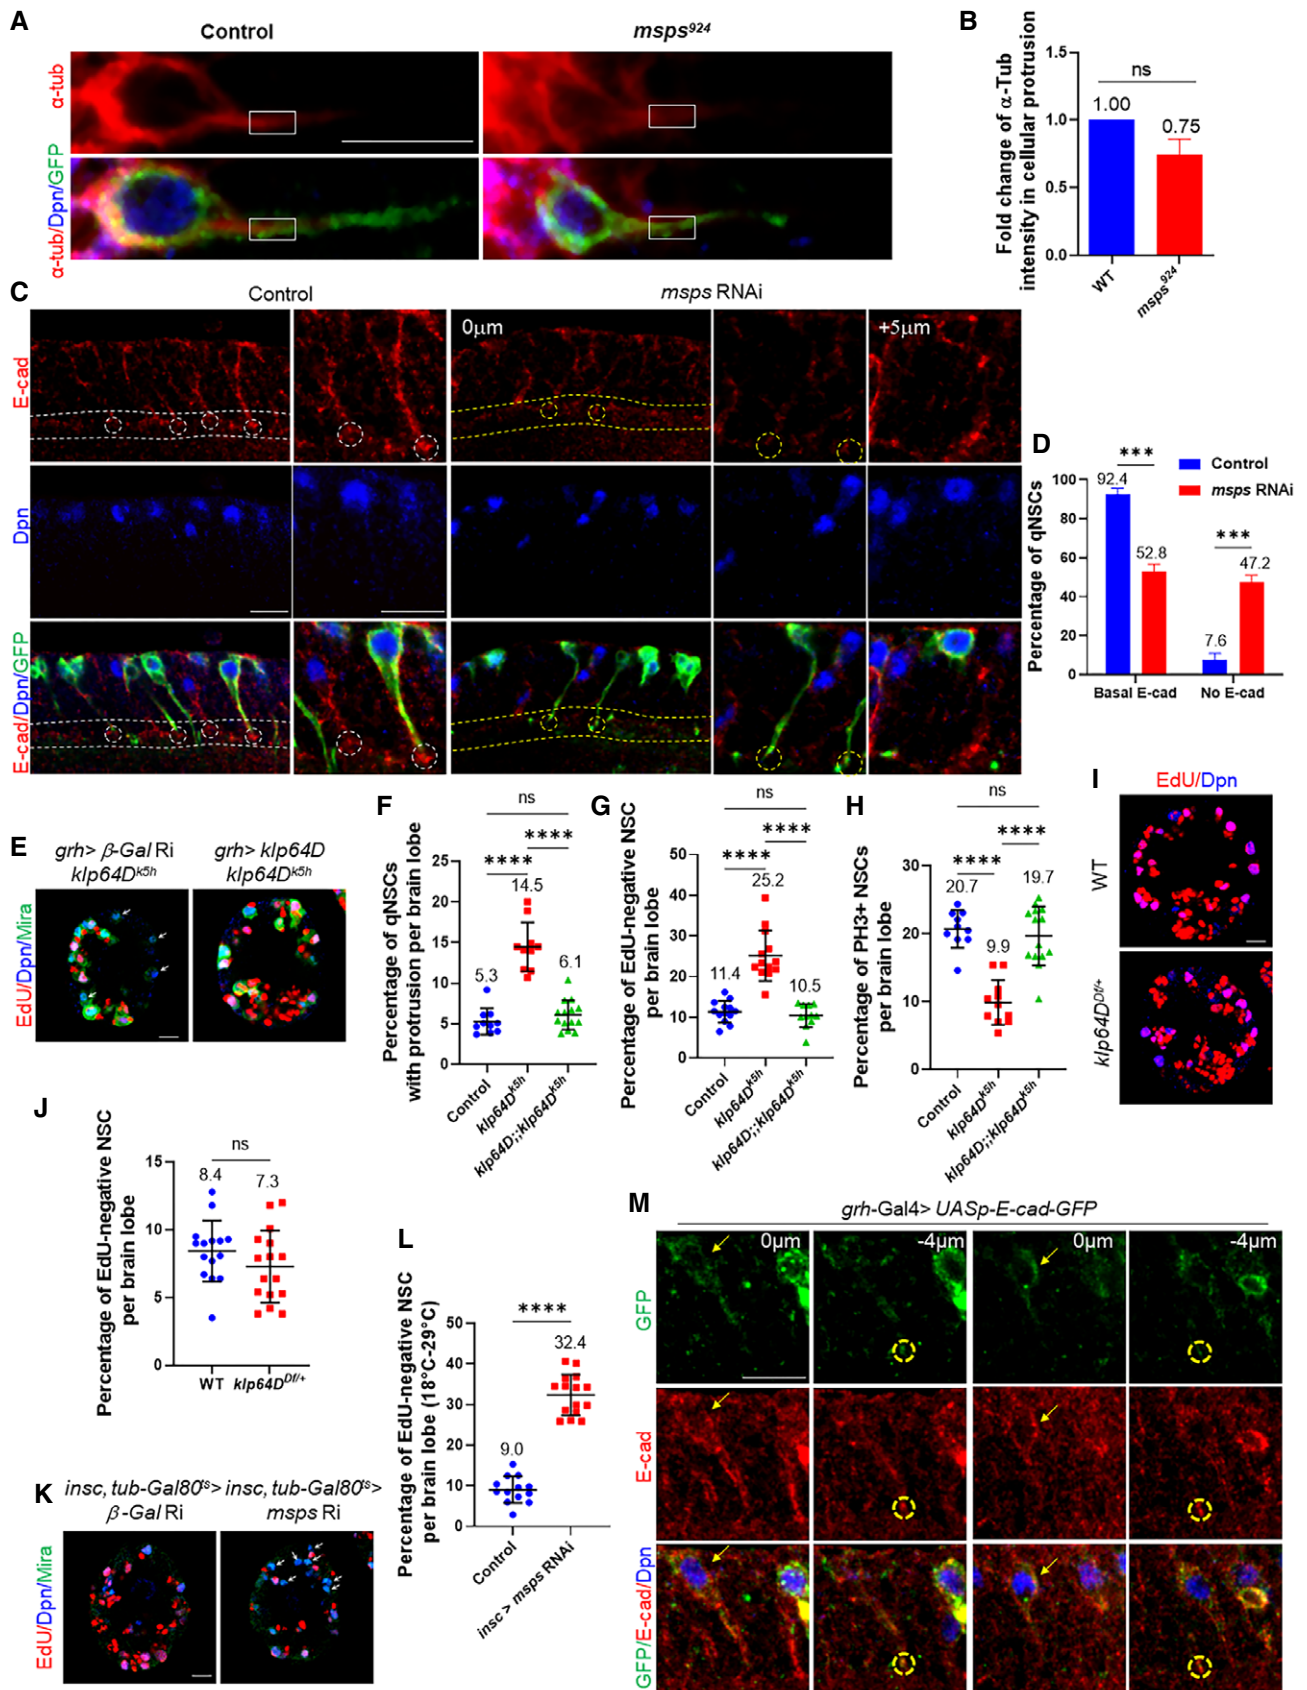

Figure EV4.



**Figure EV5. Msps, Kinesin-2, and E-cad function in the same pathway in NSC reactivation.**

- A Larval brains at 24 h ALH from control (*grh-Gal4; UAS-dicer2/UAS-β-Gal RNAi*), *kap3* RNAi I (45400), *kap3* RNAi II (103548), *klp64D* RNAi I (BDSC#40945), and *klp64D* RNAi II (103358) expressed under *grh-Gal4*; *UAS-Dicer2* were analyzed for EdU incorporation. Arrows indicate EdU-negative NSCs.
- B Quantification graph of EdU-negative NSCs per brain lobe for genotypes in (A).  $n = 15$  BL for control;  $n = 11$  BL for *kap3* RNAi I;  $n = 17$  BL for *kap3* RNAi II;  $n = 10$  BL for *klp64D* RNAi I;  $n = 11$  BL for *klp64D* RNAi II. \*\*\*\* $P < 0.0001$ .
- C Quantification graph of the percentage of qNSCs with primary protrusion for genotypes in (A). The protrusion was labeled by Mira.  $n = 20$  BL for control;  $n = 12$  BL for *kap3* RNAi I;  $n = 19$  BL for *kap3* RNAi II;  $n = 10$  BL for *klp64D* RNAi I;  $n = 13$  BL for *klp64D* RNAi II. \*\*\*\* $P < 0.0001$ ; \*\*\* $P = 0.0004$ ; \*\* $P = 0.0019$ .
- D Larval brains at 24 h ALH from RNAi control (*UAS-β-Gal RNAi; UAS-β-Gal RNAi*), *msps* RNAi (*UAS-GFP; UAS-msps* RNAi (21982)), *kap3* RNAi (*UAS-GFP + UAS-kap3* RNAi (103548)), *klp64D* RNAi (*UAS-GFP + UAS-Klp64* RNAi (103358)), *msps klp64D* double knockdown (*klp64D* RNAi + *msps* RNAi), and *msps kap3* double knockdown (*kap3* RNAi + *msps* RNAi) driven by *grh-Gal4* were examined for EdU incorporation, and larval brains were stained with EdU and Dpn. EdU-negative NSCs are indicated by arrows.
- E Quantification graph of the percentage of NSCs negative for EdU incorporation per brain lobe for genotypes in (D).  $n = 16$  BL for control;  $n = 21$  BL for *msps* RNAi;  $n = 11$  BL for *kap3* RNAi;  $n = 9$  BL for *klp64D* RNAi;  $n = 14$  BL for *klp64D* RNAi + *msps* RNAi;  $n = 17$  BL for *kap3* RNAi + *msps* RNAi. \*\*\*\* $P < 0.0001$ .
- F Quantification graph of NSC diameter for genotypes in (D).  $n = 192$  NSCs for control;  $n = 201$  NSC for *msps* RNAi;  $n = 162$  NSCs for *kap3* RNAi;  $n = 170$  NSCs for *klp64D* RNAi;  $n = 130$  NSCs for *klp64D* RNAi + *msps* RNAi;  $n = 247$  NSCs for *kap3* RNAi + *msps* RNAi. \*\*\*\* $P < 0.0001$ .
- G Larval brains at 24 h ALH from RNAi control (*UAS-β-Gal RNAi; UAS-β-Gal RNAi*), *msps* RNAi control (*UAS-GFP; UAS-msps* RNAi (21982)), *E-cad* RNAi control (*UAS-GFP + UAS-kap3* RNAi (BDSC#38207)), and double knockdown (*E-cad* RNAi + *msps* RNAi) controlled by *grh-Gal4* were analyzed for EdU incorporation, and larval brains were stained with EdU and Dpn. EdU-negative NSCs are indicated by arrows.
- H Quantification graph of the percentage of EdU-negative NSCs per brain lobe for genotypes in (G).  $n = 11$  BL for control;  $n = 13$  BL for *msps* RNAi;  $n = 12$  BL for *E-cad* RNAi;  $n = 12$  BL for *E-cad* RNAi + *msps* RNAi. \*\*\*\* $P < 0.0001$ ; \*\*\* $P = 0.0001$ .
- I Quantification graph of NSC diameter for genotypes in (G).  $n = 89$  NSCs for control;  $n = 117$  NSCs for *msps* RNAi;  $n = 103$  NSCs for *E-cad* RNAi;  $n = 216$  NSCs for *E-cad* RNAi + *msps* RNAi. \*\*\*\* $P < 0.0001$ .

Data information: in (B, C, E, F, H, I), data are presented as mean  $\pm$  SD. In (B, C, E, F, H, I), statistical significance was determined by one-way ANOVA with multiple comparisons. Scale bars: 10  $\mu$ m.

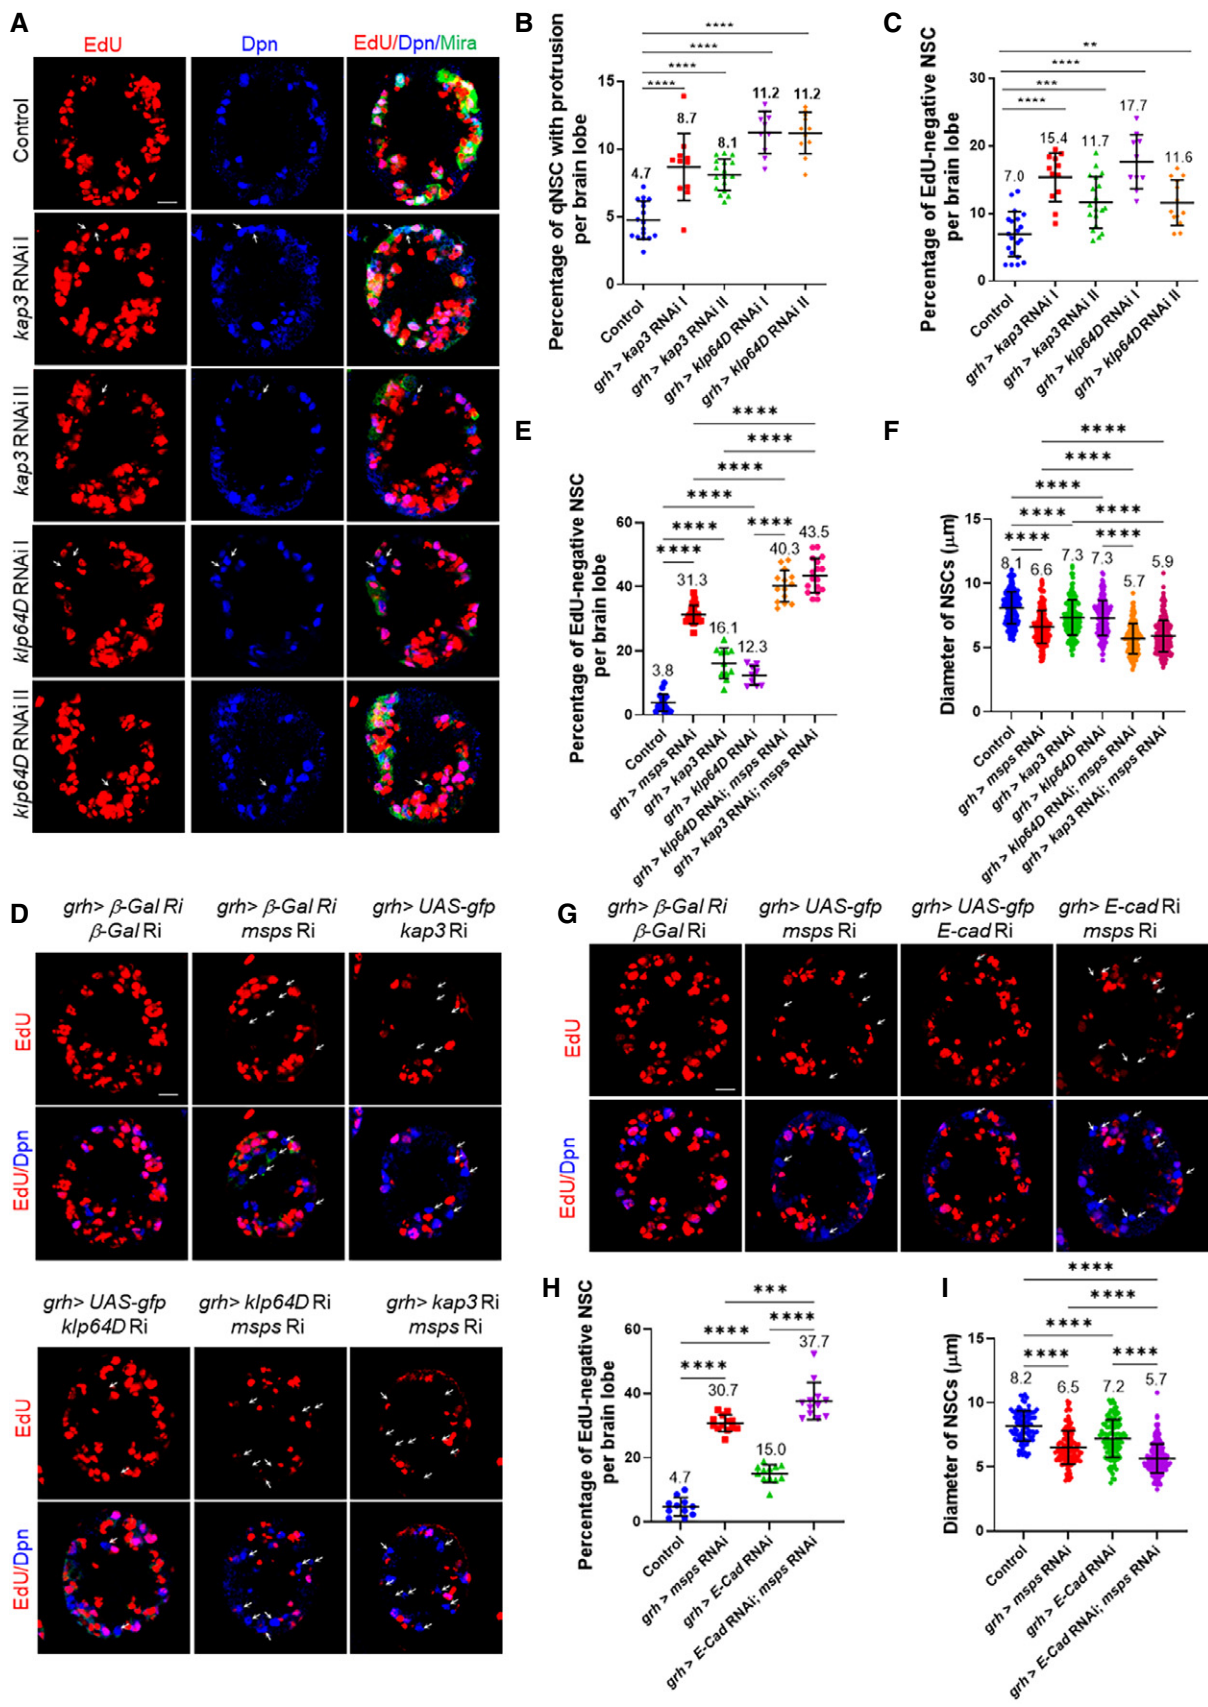

Figure EV5.
